1                   **Harnessing changes in open chromatin determined by ATAC-seq**  
2                   **to generate insulin-responsive reporter constructs.**

3  
4  
5 Collin B. Merrill<sup>1\*</sup>, Austin B. Montgomery<sup>2</sup>, Miguel A. Pabon<sup>2</sup>, Aylin R. Rodan<sup>2,3,4</sup>, and Adrian  
6 Rothenfluh<sup>1,2,4,5\*</sup>

7  
8  
9 <sup>1</sup>Department of Psychiatry, Huntsman Mental Health Institute, University of Utah, Salt Lake  
10 City, UT 84108, USA.

11 <sup>2</sup>Molecular Medicine Program, University of Utah, Salt Lake City, UT 84112, USA.

12 <sup>3</sup>Division of Nephrology, Department of Internal Medicine, University of Utah, Salt Lake City,  
13 UT 84112, USA.

14 <sup>4</sup>Department of Human Genetics, University of Utah, Salt Lake City, UT 84112, USA.

15 <sup>5</sup>Department of Neurobiology, University of Utah, Salt Lake City, UT 84112, USA.

16  
17  
18 \*Correspondence: [collin.merrill@utah.edu](mailto:collin.merrill@utah.edu), [adrian.rothenfluh@hsc.utah.edu](mailto:adrian.rothenfluh@hsc.utah.edu)

19  
20 Orcid: C.B.M. <https://orcid.org/0000-0002-7968-2707>

21           A.B.M. <https://orcid.org/0000-0003-0374-4390>

22           A.R.R. <https://orcid.org/0000-0001-9202-2378>

23           A.R.   <https://orcid.org/0000-0002-3813-5723>

24

25

26

27 **ABSTRACT.**

28 **Background:** Gene regulation is critical for proper cellular function. Next-generation  
29 sequencing technology has revealed the presence of regulatory networks that regulate gene  
30 expression and essential cellular functions. Studies investigating the epigenome have begun to  
31 uncover the complex mechanisms regulating transcription. Assay for transposase-accessible  
32 chromatin by sequencing (ATAC-seq) is quickly becoming the assay of choice for many  
33 epigenomic investigations. However, whether intervention-mediated changes in accessible  
34 chromatin determined by ATAC-seq can be harnessed to generate intervention-inducible  
35 reporter constructs has not been systematically assayed.

36 **Results:** We used the insulin signaling pathway as a model to investigate chromatin regions  
37 and gene expression changes using ATAC- and RNA-seq in insulin-treated *Drosophila* S2  
38 cells. We found correlations between ATAC- and RNA-seq data, especially when stratifying  
39 differentially-accessible chromatin regions by annotated feature type. In particular, our data  
40 demonstrated a strong correlation between chromatin regions annotated to distal promoters (1-  
41 2 kb from the transcription start site) and downstream gene expression. We cloned candidate  
42 distal promoter regions upstream of luciferase and demonstrate insulin-inducibility of several of  
43 these reporters.

44 **Conclusions:** Insulin-induced chromatin accessibility determined by ATAC-seq reveals  
45 enhancer regions that drive insulin-inducible reporter gene expression.

46  
47 **Keywords:** *Drosophila melanogaster*, S2 cells, insulin, RNA-seq, ATAC-seq  
48

49 **Background**

50 Gene regulation is essential to the development and maintenance of life. Gene regulatory  
51 networks describe the interplay between regulatory regions, such as promoters and  
52 enhancers, and expression of their target genes [1]. Deciphering how specific regulatory

53 regions control gene transcription can provide insights into biological processes such as cell  
54 type differentiation [2, 3], responses to addictive substances [4], and other cell functions.

55 The advent of new sequencing techniques has led to a greater understanding of how genes  
56 are differentially expressed. RNA-seq has provided a broader and more detailed picture of  
57 complex transcriptional states and responses [5, 6]. While genome-wide RNA-seq experiments  
58 can yield information on the many genes that are differentially transcribed in different  
59 conditions, these rich datasets reveal little about the regulatory mechanisms involved in  
60 directing these expression changes.

61 Epigenomic assays such as chromatin immunoprecipitation (ChIP-seq), DNase-seq, and  
62 assay for transposase-accessible chromatin by sequencing (ATAC-seq) can interrogate  
63 chromatin accessibility and identify transcription factor binding sites [7–9]. The relationship  
64 between chromatin accessibility and transcription is complicated. Previous studies show little  
65 overlap between corresponding differences in chromatin and transcription [10–12], which  
66 highlights the complex interactions between the chromatin state and downstream gene  
67 expression. Furthermore, few studies have analyzed if changes in open chromatin induced by  
68 an intervention occur in transcriptional enhancers that can be coupled to heterologous minimal  
69 promoters to engineer intervention-inducible reporter constructs.

70 Here, we sought to characterize the relationship between ATAC-seq and RNA-seq data in  
71 more detail, with particular focus on whether intervention-induced changes in chromatin  
72 accessibility can accurately predict gene expression. We used the insulin signaling pathway as  
73 a model because the insulin receptor activates multiple downstream signaling pathways [13–  
74 15] resulting in widespread changes to the chromatin state [16] and gene expression [17]. Our  
75 data from *Drosophila* S2 cells show that ATAC-seq and RNA-seq datasets are correlated,  
76 mainly driven by the ATAC-seq peaks/reads located in gene promoter regions. We also show  
77 that DNA regions with increased accessibility after insulin treatment can be harnessed to  
78 generate insulin-inducible reporter constructs.

## 79 **Results**

### 80 **ATAC-seq and RNA-seq changes in insulin-exposed S2 cells**

81 To investigate the concordance in changes in gene expression and chromatin accessibility, we  
82 exposed serum-starved *Drosophila* S2 cells to insulin or vehicle and harvested the cells 4  
83 hours later for ATAC-seq and RNA-seq analysis. We determined genome-wide changes in  
84 open chromatin by ATAC-seq and identified 9726 high-confidence peaks (i.e., regions of  
85 accessible DNA mapped to the nuclear genome) in the insulin-exposed S2 cells, and 9560 in  
86 the vehicle-exposed S2 cells. Merging the control and experimental peak sets resulted in  
87 10269 peaks. The largest variance in this dataset (6 samples; 2 treatments x 3 replicates)  
88 arose from insulin treatment, as shown by principal component analysis (PCA; Fig. 1A). In  
89 parallel, we identified 10287 transcripts in vehicle- and insulin-exposed S2 cells using RNA-  
90 seq. PCA indicated that the largest variance between the 6 samples resulted from insulin  
91 treatment (Fig. 1B). Because ATAC-seq provides a view of chromatin accessibility along all  
92 features of genes, we evaluated the feature distribution of both the treatment and the control  
93 ATAC-seq data (Fig. 1C). We observed the same genome features in the control and treated  
94 data, but the relative proportion of features was significantly different ( $\chi^2 = 19.6$ ,  $df = 10$ ,  $p =$   
95  $0.03$ ). This difference largely resulted from a change in the proportion of peaks annotated to  
96 distal (1-2 kb from the TSS) and proximal ( $\leq 1$  kb) promoters, which increased from 8% to 9%  
97 and 58% to 60%, respectively. These results suggest that insulin signaling recruits additional  
98 regulatory features by changing chromatin accessibility.

99

### 100 **ATAC-seq and RNA-seq reads show weak correlation driven by ATAC-seq peaks in** 101 **proximal promoters**

102 We next asked whether RNA transcript levels were correlated with ATAC-seq reads and  
103 whether the feature annotation of those ATAC-seq peaks, i.e. where in a gene they were  
104 located, mattered for any levels of correlation. 8621 out of 10269 ATAC-seq peaks were

105 mapped to a gene, and we plotted these ATAC-seq peak reads against the RNA-seq reads for  
106 each peak (thus duplicating many RNA-seq data points, since each gene has a median  
107 number of 2 (Quartile1-3: 2-4) ATAC-seq peaks mapped to it. Overall, RNA-seq and ATAC-  
108 seq peak reads showed a highly significant ( $p = 2.2e-16$ ), but weak correlation (Pearson  
109 correlation coefficient  $R = 0.1$ ; Fig 2A). When we stratified this analysis by the 11 ATAC-seq  
110 peak gene features, only the peak reads in the  $\leq 1$  kb promoter class correlated with RNA-seq  
111 reads ( $R = 0.2$ ,  $p = 2.2e-16$ ; Fig. 2B). This would suggest that more highly transcribed genes  
112 require a greater extent of DNA accessibility in their promoters, which might be expected for  
113 efficient transcriptional initiation.

114

#### 115 **Differential gene expression and DNA accessibility correlate for multiple ATAC-seq** 116 **peak feature annotations**

117 Next, we determined the insulin-induced changes in DNA accessibility and RNA expression. In  
118 the ATAC-seq peak set, 773 peaks were significantly differentially accessible (false discovery  
119 rate,  $FDR < 0.1$ ) between the insulin-exposed and the control samples. 364 of the peaks were  
120 more accessible upon insulin exposure, while 409 peaks were less accessible after exposure  
121 to insulin (Fig. 3A). The feature distribution of those differential peaks was very similar to the  
122 feature distribution in the whole ATAC-seq peak dataset ( $\chi^2 = 6.13$ ,  $df = 10$ ,  $p = 0.80$ ; Fig. 3B),  
123 though we did not detect distal downstream elements (1-2 and 2-3 kb downstream) in the  
124 differentially accessible peaks. We also examined the significant gene expression changes  
125 from the RNA-seq dataset. In this dataset, 3616 genes were differentially expressed ( $FDR <$   
126  $0.05$ ) between the insulin-exposed and control samples. 2056 genes were upregulated after  
127 insulin exposure, while 1560 were downregulated (Fig. 3C).

128 Then, we investigated the correlation between all ATAC-seq and RNA-seq  $\log_2$  fold changes  
129 after insulin treatment. The overall correlation between the two datasets was significant, but  
130 weak ( $R = 0.05$ ,  $p = 1.8e-06$ ; Fig. 4A). Performing the same analysis after stratifying by feature

131 type showed correlations between the differential RNA-seq transcripts and the differential  
132 ATAC-seq features in addition to  $\leq 1$ kb promoters ( $R = 0.096$ ,  $p = 5.7e-13$ ), including  
133 significant (though weak) correlations with ATAC-seq peaks in different promoter types (2-3 kb  
134 from the TSS:  $R = 0.15$ ,  $p = 5.4e-4$  and 1-2 kb from the TSS:  $R = 0.13$ ,  $p = 9.0e-05$ ).  
135 Furthermore, there were significant anticorrelations in ATAC-seq peaks for downstream  
136 elements (1-2 kb:  $R = -0.67$ ,  $p = 0.035$ ) and distal intergenic regions ( $R = -0.14$ ,  $p = 0.0011$ ;  
137 Fig. 4B). When we restricted the analysis to only the significant changes ( $FDR < 0.1$ ) in ATAC-  
138 seq peaks, the overall correlation for all features increased 8-fold ( $R = 0.42$ ,  $p = 4.2e-14$ ; Fig.  
139 5A), as did the correlations of several feature types (Fig. 5B). In particular, the correlation with  
140 promoters 1-2 kb from the TSS ( $R = 0.65$ ,  $p = 1.3e-4$ ) increased by approximately 5-fold.  
141 Conversely, the anticorrelations with peaks in downstream and distal intergenic regions  
142 disappeared. Together, these results suggest that DNA accessibility in distal promoters is  
143 involved in mediating changes in transcription.

144

#### 145 **Functional testing of significant differentially accessible ATAC-seq peaks**

146 We next wanted to test whether any of the DNA regions from significantly more accessible  
147 ATAC-seq peaks could drive insulin-induced expression. We cloned a number of ATAC-seq  
148 peaks in front of a luciferase gene with a minimal promoter and transfected S2 cells with these  
149 vectors for 48 h. The cells were serum-starved for 18 h and then treated with 10  $\mu$ M insulin or  
150 vehicle for 4 h. We selected three groups of four ATAC-seq peaks each: first, we chose the  
151 four peaks with the largest  $\log_2$  fold change, indicating increased accessibility after insulin  
152 treatment (Additional File 1). Of the four tested plasmids, one showed significantly increased  
153 luciferase activity after insulin treatment: 3L114 ( $p = 0.016$ ; Fig. 6A). Because ATAC-seq  
154 peaks in distal promoters were the most strongly correlated with differential gene expression in  
155 our above analysis (Fig. 5B), we next chose four peaks with the highest  $\log_2$  fold change from  
156 distal promoter regions that were significantly more accessible after insulin. Of the tested

157 peaks, 2 produced significantly increased luciferase activity after insulin treatment: 2L225 ( $p =$   
158 0.0033) and 2R111 ( $p = 0.025$ ; Fig. 6B). Lastly, because introns often contain regulatory  
159 regions that contain instructive DNA for expression [18], we chose the four intron regions with  
160 the largest  $\log_2$  fold changes for luciferase assays. One ATAC-seq peak resulted in  
161 significantly increased luciferase activity: X216 ( $p = 0.05$ ) (Fig. 6C). These data show that DNA  
162 regions with increased accessibility upon insulin treatment can indeed drive insulin-induced  
163 increases in expression when placed in front of a heterologous promoter.

164

### 165 **Limited predictability of the levels of expression and inducibility**

166 Out of the twelve ATAC-seq peaks we cloned and tested, all led to significant – though  
167 variable – levels of luciferase expression, while only four caused significant insulin-inducibility.  
168 To determine whether the luciferase expression levels and inducibility by insulin was  
169 predictable from our ATAC-seq and RNA-seq datasets, we analyzed the correlation between  
170 the –omics data and luciferase activity. First, we asked if expression levels of luciferase were  
171 correlated with ATAC-seq peak reads, but found no correlation (Fig. 7A), even when we  
172 stratified the data according to distal promoter- (Fig. 7B) or intron-derived ATAC-seq peaks  
173 (Fig. 7C). Similarly, RNA-seq counts did not correlate with S2 luciferase luminescence (Fig.  
174 7D-F). Next, we asked whether the  $\log_2$  fold changes in the –omics data sets correlated with  
175 the relative inducibility of luciferase by insulin (measured as insulin/vehicle ratios). Again, we  
176 failed to observe significant correlations of S2 inducibility with  $\log_2$  fold changes in ATAC-seq  
177 (Fig. 8A) and RNA-seq (Fig. 8B) reads, even when we analyzed only the cloned peaks that led  
178 to significant insulin-induced changes (Fig. 8C,D).

179

## 180 **DISCUSSION**

181 Next-generation sequencing has enabled an unprecedented amount of genome-wide  
182 information on RNA transcript levels and DNA accessibility. ATAC-seq data provides

183 accessibility information from distinct features/regions of a gene, thereby suggesting gene  
184 regions that act as functional enhancers (or suppressors) of gene expression. Here, we  
185 investigated the correlation between genome-wide changes in DNA accessibility and transcript  
186 levels and found significant correlations that were mostly driven by proximal and distal  
187 promoter regions. Cloning some of these DNA regions with increased accessibility upon insulin  
188 stimulation showed that some of them indeed act as transcriptional enhancers, demonstrating  
189 that genome-wide ATAC-seq can be harnessed to clone functionally-active insulin-response  
190 elements.

191 To investigate the functional relevance of differential DNA accessibility, we first determined  
192 genome-wide ATAC-seq reads in *Drosophila* S2 cells from serum-starved and insulin-exposed  
193 conditions (Fig. 1). The insulin receptor activates several downstream pathways, including the  
194 PI3K [19] and Ras/ERK [20] pathways, which have various effects on the chromatin state [21,  
195 22] and gene expression [23] during several cellular processes including cell growth, protein  
196 synthesis, and gluconeogenesis [24]. Thus, activating insulin signaling provided a way to  
197 identify broad chromatin and gene expression changes, which allowed us to integrate these  
198 physiological changes and determine whether chromatin regions that become more open after  
199 insulin signaling could predict gene regulation. We found significant overall correlations  
200 between ATAC-seq reads and transcript levels, driven by ATAC-seq peaks in proximal  
201 promoters (Fig. 2). In ATAC-seq, genome regions with increased accessibility result in a  
202 higher mapped read count [9]. Because promoter regions are critical for the initiation of  
203 transcription, these genomic regions are generally accessible for actively-transcribed genes  
204 [25]. Thus, proximal promoter regions largely drive the overall correlation between ATAC-seq  
205 and RNA-seq counts that we observed. These data indicate that normalized counts can  
206 identify correlations between chromatin and gene expression, but these correlations are likely  
207 limited to promoter regions for actively transcribed genes.



208 When we analyzed correlations between all insulin-induced  $\log_2$  fold changes in ATAC-seq  
209 peak and transcript reads (Fig. 3), changes in open chromatin in distal (1-2 and 2-3 kb away  
210 from the TSS) promoter regions also correlated significantly with changes in transcript levels  
211 (Fig. 4). This suggests that the application of insulin recruits additional distal promoters that  
212 participate in promoting transcription. Conversely, other distal promoter regions become less  
213 accessible, and the linked genes are less transcribed with insulin. These distal and proximal  
214 promoter correlations with transcript levels became even stronger when we only analyzed  
215 ATAC-seq peaks that changed significantly with insulin (Fig. 5). These results suggest that  
216 perturbations that cause differential gene expression occur via recruitment of additional  
217 regulatory promoter features. The correlations between differential transcript levels and  
218 differentially accessible promoter regions were all positive, suggesting that these regions play  
219 a role in the downstream differential gene expression. However, these data do not exclude the  
220 possibility that in some genes, insulin might lead to increased accessibility at promoters which  
221 are then bound by transcriptional repressors, leading to decreased transcription. Indeed,  
222 numerous ATAC-seq peak/transcript data points are in quadrants of anticorrelation (Fig. 5),  
223 and the insulin-induced transcription factor FOXO is known to have transcriptional repressor  
224 activity [26, 27]. Future experiments focusing on such anticorrelated data pairs/genes might  
225 reveal DNA regions that lead to insulin-induced transcriptional repression.

226 Our main goal was to determine whether we could harness our ATAC-seq data to generate  
227 insulin-inducible reporter plasmids. We selected ATAC-seq peaks based on our correlation  
228 analysis of differentially-accessible chromatin regions and differential transcript expression. We  
229 particularly focused on more distal promoters (1-2 kb from the TSS) because the correlation  
230 increase was the largest for this feature. Distal promoter regions may include regulatory  
231 regions such as enhancers or repressors that are critically involved in regulating gene  
232 expression [28]. Our results suggested that these regions can drive differential gene  
233 expression (Fig. 6). We also selected peaks with relatively large  $\log_2$  fold changes in intron

234 peaks. In *Drosophila*, intronic regions often contain regulatory sequences [18], thus altering  
235 chromatin accessibility in genome regions associated with introns is one mechanism to control  
236 gene expression [29]. Finally, we selected peaks with the largest  $\log_2$  fold changes,  
237 irrespective of feature type. In each of these three categories we found peaks that led to  
238 significant insulin-induced increases in reporter gene expression. However, none of the three  
239 categories seemed obviously more promising for predicting insulin-inducibility. Furthermore,  
240 neither read counts nor  $\log_2$  fold changes in ATAC-seq or RNA-seq were predictive of insulin-  
241 inducibility (Figs. 7, 8). This suggests that while ATAC-seq data can be successfully harnessed  
242 to generate insulin-inducible reporter constructs, their efficacy is not obviously predictable and  
243 will require larger datasets to understand which ATAC-seq peaks can be utilized to generate  
244 functionally relevant transgenes. Indeed, previous studies investigating putative enhancer  
245 elements identified candidates based on overlap with known histone marks (H3K4me1,  
246 H3K27ac, etc. identified by ChIP-seq), known enhancers associated with annotated genes of  
247 interest [30–32], or used massively parallel reporter assays [33]. In contrast, our goal was to  
248 determine whether ATAC-seq alone could predict downstream transcription using on feature-  
249 based or fold change-based selection. Importantly, these previous studies showed similar  
250 success rates to ours. Peaks with increased chromatin accessibility after insulin treatment that  
251 did not result in insulin-induced luciferase activity may represent regulatory elements that are  
252 involved in setting up poised transcription or may contain repressor regions that pause  
253 transcription. In contrast, peaks causing increased luciferase activity may represent sequences  
254 that are sufficient to initiate transcription or activate promoter clearance [34–36]. Additional  
255 studies using ChIP-seq to identify the histone marks at our tested peak sequences will be  
256 required to determine whether they are enhancers involved in poised versus active  
257 transcription.

258

259 **CONCLUSIONS**

260 Our investigation shows that ATAC-seq data can be harnessed to isolate regulatory DNA  
261 regions that are both expressed and inducible. However, because chromatin peaks may be  
262 one of several regulatory sequences [18, 28], these chromatin regions cannot be easily  
263 predicted by analysis of these genome-wide -omics data alone and must be functionally  
264 validated. Still, our data show the feasibility of using ATAC-seq to generate active transgenes  
265 that are inducible by an intervention or by a diseased state to drive a reporter, or even a  
266 disease-antidote gene.

267

## 268 **METHODS**

### 269 *Cell culture*

270 *Drosophila* S2 cells (*Drosophila* Genomics Resource Center, Bloomington, IN, USA) were  
271 cultured in Schneider's *Drosophila* Medium (ThermoFisher, Waltham, MA, USA) supplemented  
272 with 10% fetal bovine serum (ThermoFisher) at 25 °C. Cells were cultured in Schneider's  
273 medium without FBS for 24 h before experiments. Then, cells were incubated with 10 µM  
274 insulin (Sigma Aldrich, St. Louis, MO, USA) or vehicle (25 mM HEPES, pH 8.2) for 4 h at 25  
275 °C.

276

### 277 *ATAC-seq*

278 S2 cells were incubated with 3 µM DAPI for 10 min. 60,000 cells per sample were sorted using  
279 a BD FACS Aria flow cytometer (BD Biosciences, San Jose, CA, USA). DAPI-negative cells  
280 were collected into ice-cold PBS (pH 7.4). After sorting, the samples were washed once with  
281 ice-cold PBS and centrifuged at 500 g for 5 min at 4 °C. ATAC-seq libraries were prepared as  
282 previously described [37]. Briefly, 50 µL lysis buffer (10 mM Tris-HCl 7.4, 10 mM NaCl, 3 mM  
283 MgCl<sub>2</sub>, 0.1% NP40) was added to each sample, and the sample was centrifuged at 500 g for  
284 10 min at 4 °C. The supernatant was removed, and the nuclei pellet was tagmented using a  
285 Nextera DNA Library Prep kit (Illumina, Inc., San Diego, CA, USA) as previously described.

286 Then, the tagmented DNA was purified using a Qiagen MinElute PCR Purification Kit (Qiagen,  
287 Germantown, MD, USA). The purified DNA was PCR amplified for 5 cycles using a Nextera  
288 DNA Library Index kit (Illumina) and Phusion HF Master Mix (New England BioLabs, Inc.,  
289 Ipswich, MA, USA) with the following protocol: 72 °C for 5 min, 98 °C for 30 sec, and 5 cycles  
290 of 98 °C for 10 sec, 63 °C for 30 sec, and 72 °C for 1 min. A 5- $\mu$ L aliquot of the pre-amplified  
291 reaction was analyzed by qPCR using SsoFast EvaGreen Supermix (Bio-Rad Life Science,  
292 Inc., Hercules, CA, USA) and an Applied Biosystems 7900HT qPCR instrument  
293 (ThermoFisher) using the following protocol: 1 cycle of 98 °C for 30 sec and 40 cycles of 98 °C  
294 for 10 sec, 63 °C for 30 sec, and 72 °C for 1 min. Then, the pre-amplified PCR mixture was  
295 amplified for another 10 cycles (corresponding to 1/3 maximum fluorescence from the qPCR  
296 assay) using the same thermocycling parameters. After amplification, the libraries were  
297 purified using AMPure XP beads (Beckman Coulter Life Sciences, Indianapolis, IN, USA).  
298 Libraries were sequenced on an Illumina HiSeq 2500 instrument using 50-bp single-end reads.

299

### 300 *RNA-seq*

301 Total RNA was isolated from S2 cells using a PureLink RNA purification kit (ThermoFisher).  
302 Then, rRNA was removed from each sample with a Ribo-Zero rRNA Removal kit (Illumina).  
303 RNA libraries were constructed using a NEBNext Ultra II RNA Library Kit for Illumina and  
304 NEBNext Multiplex Oligos for Illumina, Primer Set 1 (New England Biolabs). Libraries were  
305 sequenced on an Illumina HiSeq 2500 instrument using 50-bp single-end reads.

306

### 307 *ATAC-seq data analysis*

308 ATAC-seq Fastq files were aligned to the dm6 genome assembly  
309 ([http://ftp.flybase.net/releases/FB2018\\_06/dmel\\_r6.25/fasta/](http://ftp.flybase.net/releases/FB2018_06/dmel_r6.25/fasta/)) using Novocraft Novoalign with  
310 the following settings: --NonC -o SAM -r Random. SAM files were processed to BAM format,  
311 sorted, and indexed using Samtools [38]. BAM files were reads per million-normalized and

312 converted to bigWig files using the Bio-ToolBox 'bam2wig.pl' program  
313 (<https://github.com/tjarnell/biobox/blob/master/scripts/bam2wig.pl>). Peak calling was  
314 performed on the bigWig files by utilizing the Multi-Replicate Macs ChIPseq pipeline  
315 (<https://github.com/HuntsmanCancerInstitute/MultiRepMacsChIPseq>) with the following  
316 settings: --dupfrac 0.2 --size 200 --cutoff 2 --peaksizes 300 --peakgap 200. Called peaks were  
317 annotated in R with the ChIPseeker package [39]. Count data for called peaks was collected  
318 from processed BAM files using the Bio-ToolBox 'get\_datasets.pl' program  
319 ([https://metacpan.org/pod/distribution/Bio-ToolBox/scripts/get\\_datasets.pl](https://metacpan.org/pod/distribution/Bio-ToolBox/scripts/get_datasets.pl)). The count data  
320 was then used to identify differentially accessible regions with the R package DEseq2 [40].

321

### 322 *RNA-seq data analysis*

323 RNA-seq fastq files were aligned to the BDGP6 genome assembly using the STAR aligner [41]  
324 with the following settings: --twopassMode Basic --outSAMtype BAM SortedByCoordinate --  
325 outWigType bedGraph --outWigStrand Unstranded --clip3pAdapterseq  
326 AGATCGGAAGAGCACACGTCTGAACTCCAGTCA. The resulting sorted BAM files were  
327 indexed using Samtools (Li et al., 2009). FeatureCounts was used to collect count data for  
328 BDGP6 genes using the following command: -T 16 -s 2 [42]. Count data for all replicates and  
329 experimental conditions were combined into a single count matrix in R. The count matrix was  
330 subsequently used to identify differentially expressed genes with the R package DEseq2 [40].

331

### 332 *Integration analysis of ATAC-Seq and RNA-Seq datasets*

333 The ATAC-seq peak data were compared to the RNA-seq data to determine how chromatin  
334 accessibility influenced gene expression. The raw RNA-seq and ATAC-seq counts for each  
335 sample were compared using the gene annotation of the ATAC-seq peak and the assigned  
336 RNA-seq gene. The raw count value was averaged by experimental condition and genomic  
337 assay type. Then, the RNA-seq and ATAC-seq datasets were compared using the annotated

338 genes and the  $\log_2$  fold change values for each peak/gene in the respective genomic assay.  
339 ATAC-seq peaks with an FDR < 0.1 and genes detected by RNA-seq with an FDR < 0.05 were  
340 used to compare the differentially accessible peaks and differentially expressed genes.  
341 Pearson correlation analysis was performed between the  $\log_2$  fold change values of the  
342 genomic assays and between the average raw count values of the genomic assays (controlling  
343 for the experimental condition).

344

#### 345 *Plasmid construction and transformation*

346 A multiple cloning site (MCS) was cloned into the backbone pDEST VanGlow-GL vector [43].  
347 Then, we removed the *mini-white*<sup>+</sup> cassette using the restriction enzymes AflIII (3L137, 3R131,  
348 X216, 3L114, 2L796, 3L981, 2L220, 2R177, 2L225, and FOXO TFBS) or SmaI and PmlI  
349 (X950, 2L846, and 2R111). The digested plasmids were incubated with T4 ligase for 15 min at  
350 room temperature and purified by 1% gel electrophoresis. The plasmids were linearized using  
351 AvrII and PacI (sites contained in MCS; all enzymes from New England BioLabs).

352 Genomic DNA was purified from S2 cells using a Monarch Genomic DNA Purification kit.  
353 Candidate chromatin peak sequences and 100-200 bp flanking sequences [32] (Additional File  
354 1) were amplified using Phusion High-Fidelity PCR MasterMix (primer sequences are listed in  
355 Additional File 2) and a C1000 thermocycler (Bio-Rad Life Science). The peak sequences  
356 were amplified for 98 °C for 5 min, followed by 35 cycles of 98 °C for 30 sec, 52-68 °C gradient  
357 for 30 sec, 72 °C for 4 min, and a final incubation for 5 min at 72 °C. The amplified fragments  
358 were purified on 1% agarose gels and extracted using a Monarch Gel Purification kit and  
359 cloned into linearized VanGlo-GL-MCS plasmid using NEBuilder HiFi Assembly master mix.  
360 The assembled plasmids were transformed into DH5 $\alpha$  cells and grown overnight. Clones were  
361 screened by restriction digestion using EcoRI-HF. Sequences were confirmed by Sanger  
362 sequencing at GeneWiz (South Plainfield, NJ, USA). Confirmed plasmids were transformed

363 into S2 cells using TransIT Insect Transfection Reagent (Mirus Bio, Madison, WI, USA).

364 Transformed cells were grown for 48 h before use in experiments.

365

### 366 *Luciferase assays*

367 Transformed S2 cells were serum starved for 24 h and treated with insulin or vehicle as

368 described above (*Cell culture*). Then, luciferase activity was assayed using a Luciferase

369 Reporter Substrate Assay Kit-Firefly (Abcam, Cambridge, MA, USA). Luminescence was

370 detected with a BioTek Synergy HTX microplate reader (BioTek Instruments, Winooski, VT,

371 USA) and Gen5 2.01.17 software (BioTek Instruments).

372

### 373 *Statistical analysis*

374 Statistical differences in relative luminescence data were analyzed by Student's t-tests with at

375 least three biological replicates using GraphPad Prism 9.0 software. Differences between

376 genome feature proportions were analyzed using  $\chi^2$  tests included in R [44] Correlations were

377 analyzed using Pearson correlation tests included in R. Heatmaps were generated using the R

378 package ComplexHeatmap [45]. PCA plots were created using the R package pcaExplorer

379 [46]. Correlation plots were produced with the R package ggpubr

380 (<https://github.com/kassambara/ggpubr>).

381

## 382 DECLARATIONS

### 383 *Ethics approval and consent to participate*

384 Not applicable

### 385 *Consent for publication*

386 Not applicable

### 387 *Availability of data and materials*

388 All sequencing data are deposited in the Sequence Read Archive (BioProject ID:  
389 PRJNA730574; <https://www.ncbi.nlm.nih.gov/sra/PRJNA730574>). Plasmids developed in this  
390 study are available upon reasonable request.

#### 391 *Competing interests*

392 The authors declare no competing interests.

#### 393 *Funding*

394 This study was supported by grants from the National Institute of Health: National Institute on  
395 Drug Abuse (Grant R21DA049635, to AR), the National Institute on Alcohol Abuse and  
396 Alcoholism (R01AA026818 to AR), and the National Institute of Diabetes and Digestive and  
397 Kidney Disease (R01DK110358 to ARR).

#### 398 *Author contributions*

399 CBM performed the ATAC-seq and RNA-seq experiments, constructed the luciferase  
400 plasmids, analyzed data, and wrote the manuscript. ABM analyzed the sequencing data and  
401 wrote the manuscript. MAP constructed luciferase plasmids and revised the manuscript. ARR  
402 edited the manuscript and procured funding. AR oversaw the project, edited the manuscript,  
403 and procured funding. All authors read and approved the final manuscript.

#### 404 *Acknowledgments*

405 We thank members of the lab for continued discussion. This work was supported by the  
406 University of Utah Flow Cytometry Facility, the University of Utah Genomics Core Facility, the  
407 High Throughput Sequencing Core at the Huntsman Cancer Institute, and the National Cancer  
408 Institute through Award Number 5P30CA042014. The content is solely the responsibility of the  
409 authors and does not necessarily represent the official views of the National Institutes of  
410 Health.

#### 411 *Additional files*

412 Additional\_File\_1.xlsx; ATAC-seq peaks that were cloned and tested in luciferase assays.

413 Additional\_File\_2.xlsx; Primer sequences used for cloning.



414 REFERENCES

- 415 1. MacNeil LT, Walhout AJM. Gene regulatory networks and the role of robustness and  
416 stochasticity in the control of gene expression. *Genome Research*. 2011;21:645–57.
- 417 2. Goode DK, Obier N, Vijayabaskar MS, Lie-A-Ling M, Lilly AJ, Hannah R, et al. Dynamic  
418 Gene Regulatory Networks Drive Hematopoietic Specification and Differentiation. *Dev Cell*.  
419 2016;36:572–87.
- 420 3. Tokusumi Y, Tokusumi T, Shoue DA, Schulz RA. Gene regulatory networks controlling  
421 hematopoietic progenitor niche cell production and differentiation in the *Drosophila* lymph  
422 gland. *PLoS One*. 2012;7:41604.
- 423 4. Morozova T V, Mackay TFC, Anholt RRH. Transcriptional networks for alcohol sensitivity in  
424 *Drosophila melanogaster*. *Genetics*. 2011;187:1193–205.
- 425 5. Duarte FM, Fuda NJ, Mahat DB, Core LJ, Guertin MJ, Lis JT. Transcription factors GAF and  
426 HSF act at distinct regulatory steps to modulate stress-induced gene activation. 2016.
- 427 6. Petruccelli E, Brown T, Waterman A, Ledru N, Kaun KR. Alcohol Causes Lasting Differential  
428 Transcription in *Drosophila* Mushroom Body Neurons. 2020.
- 429 7. Jothi R, Cuddapah S, Barski A, Cui K, Zhao K. Genome-wide identification of in vivo protein-  
430 DNA binding sites from ChIP-Seq data. *Nucleic Acids Res*. 2008;36:5221–31.
- 431 8. Song L, Crawford GE. DNase-seq: A high-resolution technique for mapping active gene  
432 regulatory elements across the genome from mammalian cells. *Cold Spring Harb Protoc*.  
433 2010;5:pdb.prot5384.
- 434 9. Buenrostro JD, Giresi PG, Zaba LC, Chang HY, Greenleaf WJ. Transposition of native  
435 chromatin for fast and sensitive epigenomic profiling of open chromatin, DNA-binding proteins  
436 and nucleosome position. *Nat Methods*. 2013;10:1213–8.
- 437 10. Kagohara LT, Zamuner F, Davis-Marcisak EF, Sharma G, Considine M, Allen J, et al.  
438 Integrated single-cell and bulk gene expression and ATAC-seq reveals heterogeneity and early  
439 changes in pathways associated with resistance to cetuximab in HNSCC-sensitive cell lines.

- 440 Br J Cancer 2020 1231. 2020;123:101–13.
- 441 11. Li X, Chen Y, Fu C, Li H, Yang K, Bi J, et al. Characterization of epigenetic and  
442 transcriptional landscape in infantile hemangiomas with ATAC-seq and RNA-seq.  
443 <https://doi.org/10.2217/epi-2020-0060>. 2020;12:893–905.
- 444 12. Ackermann AM, Wang Z, Schug J, Naji A, Kaestner KH. Integration of ATAC-seq and  
445 RNA-seq identifies human alpha cell and beta cell signature genes. *Mol Metab*. 2016;5:233–  
446 44.
- 447 13. McNeill H, Craig GM, Bateman JM. Regulation of neurogenesis and epidermal growth  
448 factor receptor signaling by the insulin receptor/target of rapamycin pathway in drosophila.  
449 *Genetics*. 2008;179:843–53.
- 450 14. Kido Y, Nakae J, Accili D. The Insulin Receptor and Its Cellular Targets 1 . *J Clin*  
451 *Endocrinol Metab*. 2001;86:972–9.
- 452 15. Puig O, Marr MT, Ruhf ML, Tjian R. Control of cell number by Drosophila FOXO:  
453 downstream and feedback regulation of the insulin receptor pathway. 2003.
- 454 16. Kulkarni MM, Kulkarni MM, Sopko R, Sun X, Hu Y, Nand A, et al. An Integrative Analysis of  
455 the InR/PI3K/Akt Network Identifies the Dynamic Response to Insulin Signaling. *Cell Rep*.  
456 2016;16:3062–74.
- 457 17. Post S, Karashchuk G, Wade JD, Sajid W, De Meyts P, Tatar M. Drosophila Insulin-Like  
458 Peptides DILP2 and DILP5 Differentially Stimulate Cell Signaling and Glycogen Phosphorylase  
459 to Regulate Longevity. *Front Endocrinol (Lausanne)*. 2018;9:245.
- 460 18. Roy S, Ernst J, Kharchenko P V., Kheradpour P, Negre N, Eaton ML, et al. Identification of  
461 functional elements and regulatory circuits by Drosophila modENCODE. *Science (80- )*.  
462 2010;330:1787–97.
- 463 19. Dekanty A, Lavista-Llanos S, Irisarri M, Oldham S, Wappner P. The insulin-PI3K/TOR  
464 pathway induces a HIF-dependent transcriptional response in Drosophila by promoting nuclear  
465 localization of HIF- $\alpha$  /Sima. *J Cell Sci*. 2005;118:5431–41.

- 466 20. Zhang W, Thompson BJ, Hietakangas V, Cohen SM. MAPK/ERK signaling regulates  
467 insulin sensitivity to control glucose metabolism in *Drosophila*. *PLoS Genet*. 2011;7:1002429.
- 468 21. Mouchel-Vielh E, Rougeot J, Decoville M, Peronnet F. The MAP kinase ERK and its  
469 scaffold protein MP1 interact with the chromatin regulator Corto during *Drosophila* wing tissue  
470 development. *BMC Dev Biol*. 2011;11:1–14.
- 471 22. Sánchez-Alegría K, Flores-León M, Avila-Muñoz E, Rodríguez-Corona N, Arias C. PI3K  
472 signaling in neurons: A central node for the control of multiple functions. *International Journal*  
473 *of Molecular Sciences*. 2018;19:3725.
- 474 23. Garofalo RS. Genetic analysis of insulin signaling in *Drosophila*. *Trends in Endocrinology*  
475 *and Metabolism*. 2002;13:156–62.
- 476 24. Goberdhan DCI, Wilson C. The functions of insulin signaling: Size isn't everything, even in  
477 *Drosophila*. *Differentiation*. 2003;71:375–97.
- 478 25. Blythe SA, Wieschaus EF. Establishment and maintenance of heritable chromatin structure  
479 during early *Drosophila* embryogenesis. *Elife*. 2016;5.
- 480 26. Jünger MA, Rintelen F, Stocker H, Wasserman JD, Végh M, Radimerski T, et al. The  
481 *Drosophila* Forkhead transcription factor FOXO mediates the reduction in cell number  
482 associated with reduced insulin signaling. *J Biol*. 2003;2:20.
- 483 27. Ramaswamy S, Nakamura N, Sansal I, Bergeron L, Sellers WR. A novel mechanism of  
484 gene regulation and tumor suppression by the transcription factor FKHR. *Cancer Cell*.  
485 2002;2:81–91.
- 486 28. Gisselbrecht SS, Palagi A, Kurland J V., Rogers JM, Ozadam H, Zhan Y, et al.  
487 Transcriptional Silencers in *Drosophila* Serve a Dual Role as Transcriptional Enhancers in  
488 Alternate Cellular Contexts. *Mol Cell*. 2020;77:324-337.e8.
- 489 29. Duret L. Why do genes have introns? Recombination might add a new piece to the puzzle.  
490 *Trends in Genetics*. 2001;17:172–5.
- 491 30. Daugherty AC, Yeo RW, Buenrostro JD, Greenleaf WJ, Kundaje A, Brunet A. Chromatin

- 492 accessibility dynamics reveal novel functional enhancers in *C. elegans*. *Genome Res.*  
493 2017;27:2096–107.
- 494 31. Quillien A, Abdalla M, Yu J, Ou J, Zhu LJ, Lawson ND. Robust Identification of  
495 Developmentally Active Endothelial Enhancers in Zebrafish Using FANS-Assisted ATAC-Seq.  
496 *Cell Rep.* 2017;20:709–20.
- 497 32. Cusanovich DA, Reddington JP, Garfield DA, Daza RM, Aghamirzaie D, Marco-Ferreres R,  
498 et al. The cis-regulatory dynamics of embryonic development at single-cell resolution. *Nature.*  
499 2018;555:538–42.
- 500 33. Hrvatin S, Tzeng CP, Nagy MA, Stroud H, Koutsoumpa C, Wilcox OF, et al. A scalable  
501 platform for the development of cell-type-specific viral drivers. *Elife.* 2019;8.
- 502 34. Klemm SL, Shipony Z, Greenleaf WJ. Chromatin accessibility and the regulatory  
503 epigenome. *Nature Reviews Genetics.* 2019;20.
- 504 35. Bae S, Lesch BJ. H3K4me1 Distribution Predicts Transcription State and Poising at  
505 Promoters. *Front Cell Dev Biol.* 2020;8:289.
- 506 36. Koenecke N, Johnston J, Gaertner B, Natarajan M, Zeitlinger J. Genome-wide  
507 identification of *Drosophila* dorso-ventral enhancers by differential histone acetylation analysis.  
508 *Genome Biol.* 2016;17:1–19.
- 509 37. Buenrostro JD, Wu B, Chang HY, Greenleaf WJ. ATAC-seq: A method for assaying  
510 chromatin accessibility genome-wide. *Curr Prot Mol Biol.* 2015 Jan;109(1):21-9.
- 511 38. Li H, Handsaker B, Wysoker A, Fennell T, Ruan J, Homer N, et al. The Sequence  
512 Alignment/Map format and SAMtools. *Bioinformatics.* 2009;25:2078–9.
- 513 39. Yu G, Wang LG, He QY. ChIP seeker: An R/Bioconductor package for ChIP peak  
514 annotation, comparison and visualization. *Bioinformatics.* 2015;31:2382–3.
- 515 40. Anders S, Huber W. Differential expression analysis for sequence count data. 2010.
- 516 41. Dobin A, Davis CA, Schlesinger F, Drenkow J, Zaleski C, Jha S, et al. STAR: Ultrafast  
517 universal RNA-seq aligner. *Bioinformatics.* 2013;29:15–21.

- 518 42. Liao Y, Smyth GK, Shi W. FeatureCounts: An efficient general purpose program for  
519 assigning sequence reads to genomic features. *Bioinformatics*. 2014;30:923–30.
- 520 43. Janssens DH, Hamm DC, Anhezini L, Xiao Q, Siller KH, Siegrist SE, et al. An  
521 Hdac1/Rpd3-Poised Circuit Balances Continual Self-Renewal and Rapid Restriction of  
522 Developmental Potential during Asymmetric Stem Cell Division. *Dev Cell*. 2017;40:367-380.e7.
- 523 44. R Core. R.:A language and environment for statistical computing. 2020.
- 524 45. Gu Z, Eils R, Schlesner M. Complex heatmaps reveal patterns and correlations in  
525 multidimensional genomic data. *Bioinformatics*. 2016;32:2847–9.
- 526 46. Marini F, Binder H. PcaExplorer: An R/Bioconductor package for interacting with RNA-seq  
527 principal components. *BMC Bioinformatics*. 2019;20:1–8.

528

529

## 530 **FIGURE CAPTIONS**

531 **Figure 1. Insulin induces widespread alterations in chromatin accessibility and**  
532 **transcription.** Serum-starved S2 cells were treated with vehicle or insulin for 4 h, and nucleic  
533 acids were isolated and analyzed. A) Principal component analysis of chromatin accessibility  
534 determined by ATAC-seq. B) Principal component analysis of transcript expression by RNA-  
535 seq. C) Proportions of each genomic feature type in all annotated chromatin peaks analyzed  
536 by ATAC-seq in S2 cells after treatment with insulin or vehicle.

537

538 **Figure 2. Chromatin peaks annotated to proximal promoters drive the correlation**  
539 **between normalized ATAC-seq and RNA counts.** A) Transcripts identified by RNA-seq were  
540 overlapped with chromatin peaks annotated to the same genes. The normalized ATAC- and  
541 RNA-seq counts were log scaled and analyzed using Pearson correlation analysis. B)  
542 Overlapping ATAC- and RNA-seq counts from (A) were stratified by genomic feature. Pearson  
543 correlation analysis was used to identify feature-specific correlations between ATAC- and

544 RNA-seq counts. Here, and in following figures, ns = not significant, \* $p < 0.05$ ; \*\* $p < 0.01$ ; \*\*\* $p$   
545  $< 0.001$ .

546

547 **Figure 3. Insulin induces differential chromatin accessibility and gene expression in S2**

548 **cells.** A) Heatmap of differential chromatin accessibility in significantly different chromatin

549 peaks, stratified by feature type. Each row represents an individual chromatin peak. The

550 values in each row were scaled to the row mean. Red indicates more-accessible chromatin

551 regions and blue indicates less-accessible regions. B) Proportions of genomic features

552 annotated to chromatin peaks with differential accessibility after treatment with insulin or

553 vehicle. C) Heatmap of differential gene expression in S2 cells after treatment with vehicle or

554 insulin. Each row represents a significantly differentially-expressed transcript. The values in

555 each row are scaled to the row mean. Red indicates an upregulated gene and blue indicates a

556 downregulated gene.

557

558 **Figure 4. Insulin-induced  $\log_2$  fold changes correlate between ATAC-seq and RNA-seq.**

559 A) Chromatin peaks were overlapped with expressed transcripts. Pearson correlation analysis

560 shows a weak correlation between  $\log_2$  fold changes in chromatin accessibility and transcript

561 expression. B) Overlapping ATAC- and RNA-seq  $\log_2$  fold change values from (A) were

562 stratified by genomic feature. Pearson correlation analysis was used to identify correlations

563 between ATAC- and RNA-seq counts by feature.

564

565 **Figure 5. Significant insulin-induced changes in ATAC-seq indicates recruitment of**

566 **distal promoters for transcript regulation.** A) Significant  $\log_2$  fold change values from

567 differentially-accessible chromatin peaks and differentially-expressed transcripts were

568 analyzed by Pearson correlation analysis. B) Overlapping chromatin peaks and differentially-

569 expressed genes from (A) were stratified by feature type and reveal distal (1-2 kb) promoter

570 accessibility as correlated with insulin-induced transcript changes.

571  
572 **Figure 6. Cloned DNA from differentially-accessible chromatin regions can induce**  
573 **luciferase activity upon insulin application.** DNA was cloned in front of a minimal promoter  
574 and luciferase gene, S2 cells were transfected for 18 h and then treated with insulin or vehicle  
575 for 4 h. A) Candidate ATAC-seq peaks were selected by the largest  $\log_2$  fold change. B)  
576 Chromatin peaks from promoters (1-2 kb from the TSS) were the feature that was most highly  
577 correlated with differential transcript expression. Peaks with the highest  $\log_2$  fold change from  
578 this correlation were cloned upstream of luciferase for functional validation. C) Chromatin  
579 peaks with significantly different accessibility were selected from introns, a genomic feature  
580 known to contain regulatory regions. Data represent means  $\pm$  standard error of three biological  
581 replicates. Differences were analyzed by Student's t-test.

582  
583 **Fig. 7. ATAC-seq and RNA-seq counts are not correlated with functional luciferase**  
584 **activity.** Log-transformed ATAC-seq counts (A-C) and RNA-seq counts (D-F) from S2 cells  
585 were correlated to insulin-induced luciferase activity. A) Overall correlation between counts  
586 from the tested ATAC-seq peaks and luciferase activity; B) Promoters; C) Introns. D) Overall  
587 correlations between counts from genes annotated to the tested ATAC-seq peaks and  
588 luciferase activity; E) Promoters; F) Introns. Associations were analyzed by Pearson  
589 correlation analysis. Each point represents a biological replicate, and each peak was tested in  
590 triplicate.

591  
592 **Fig. 8. ATAC-seq and RNA-seq  $\log_2$  fold changes do not predict insulin inducibility.** A)  
593 ATAC-seq and B) RNA-seq  $\log_2$  fold changes from S2 cells were correlated to insulin-induced  
594 luciferase activity, shown as the ratio between luciferase activity in vehicle- vs. insulin treated  
595 cells. C) Correlation between the ATAC-seq peaks driving significantly increased luciferase  
596 activity and associated ATAC-seq  $\log_2$  fold changes. D) Correlation between the ATAC-seq

597 peaks driving significantly increased luciferase activity and RNA-seq log<sub>2</sub> fold changes in the  
598 associated genes. Associations were analyzed by Pearson correlation analysis. Each point  
599 represents a biological replicate, and each peak was tested in triplicate.



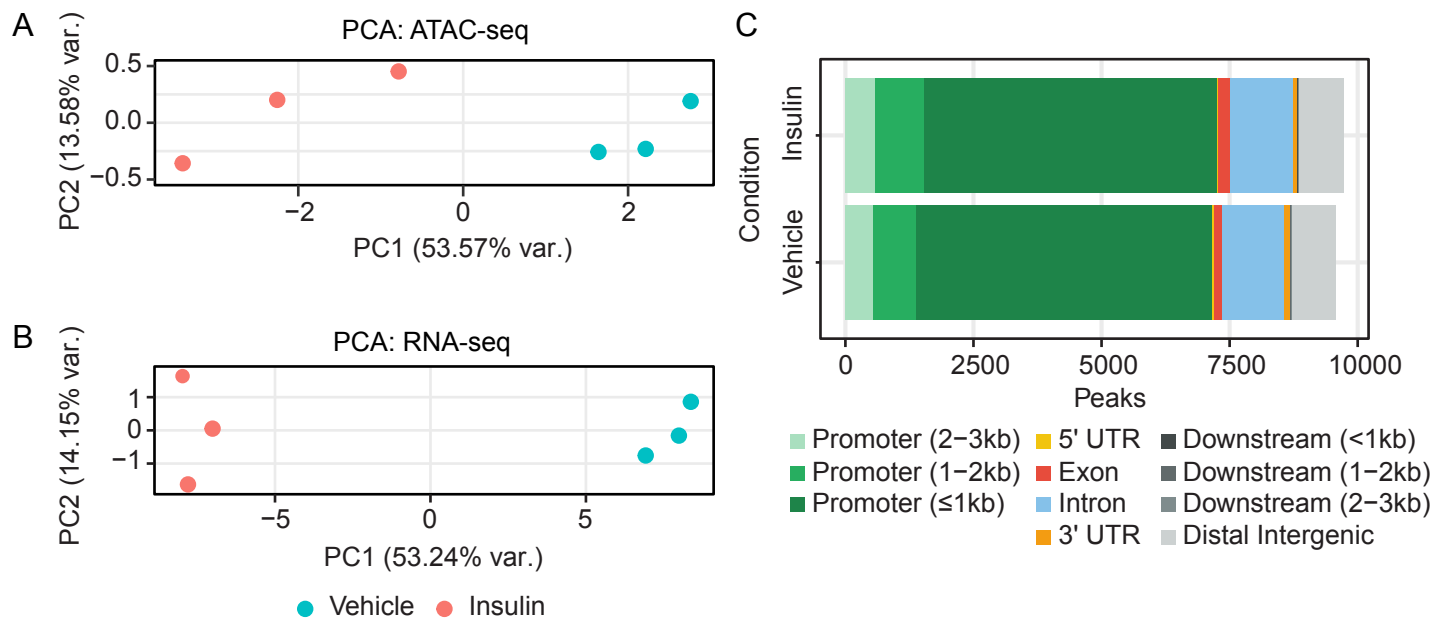

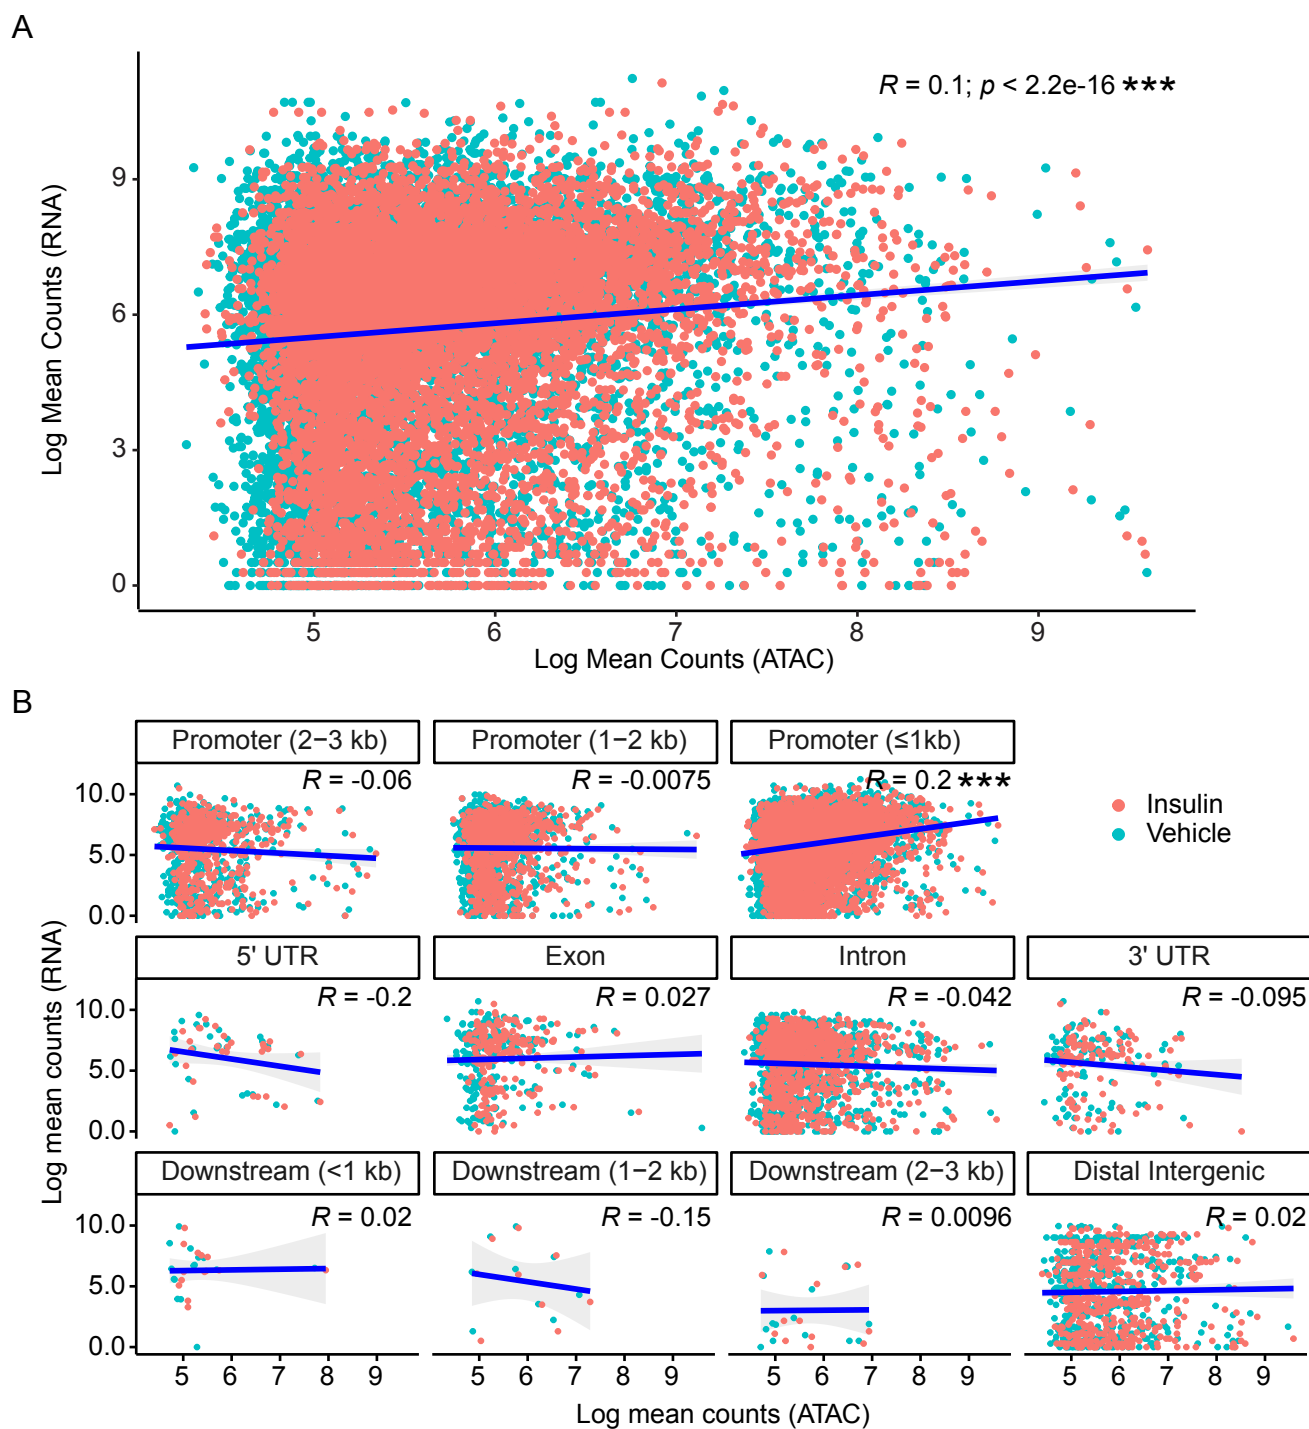

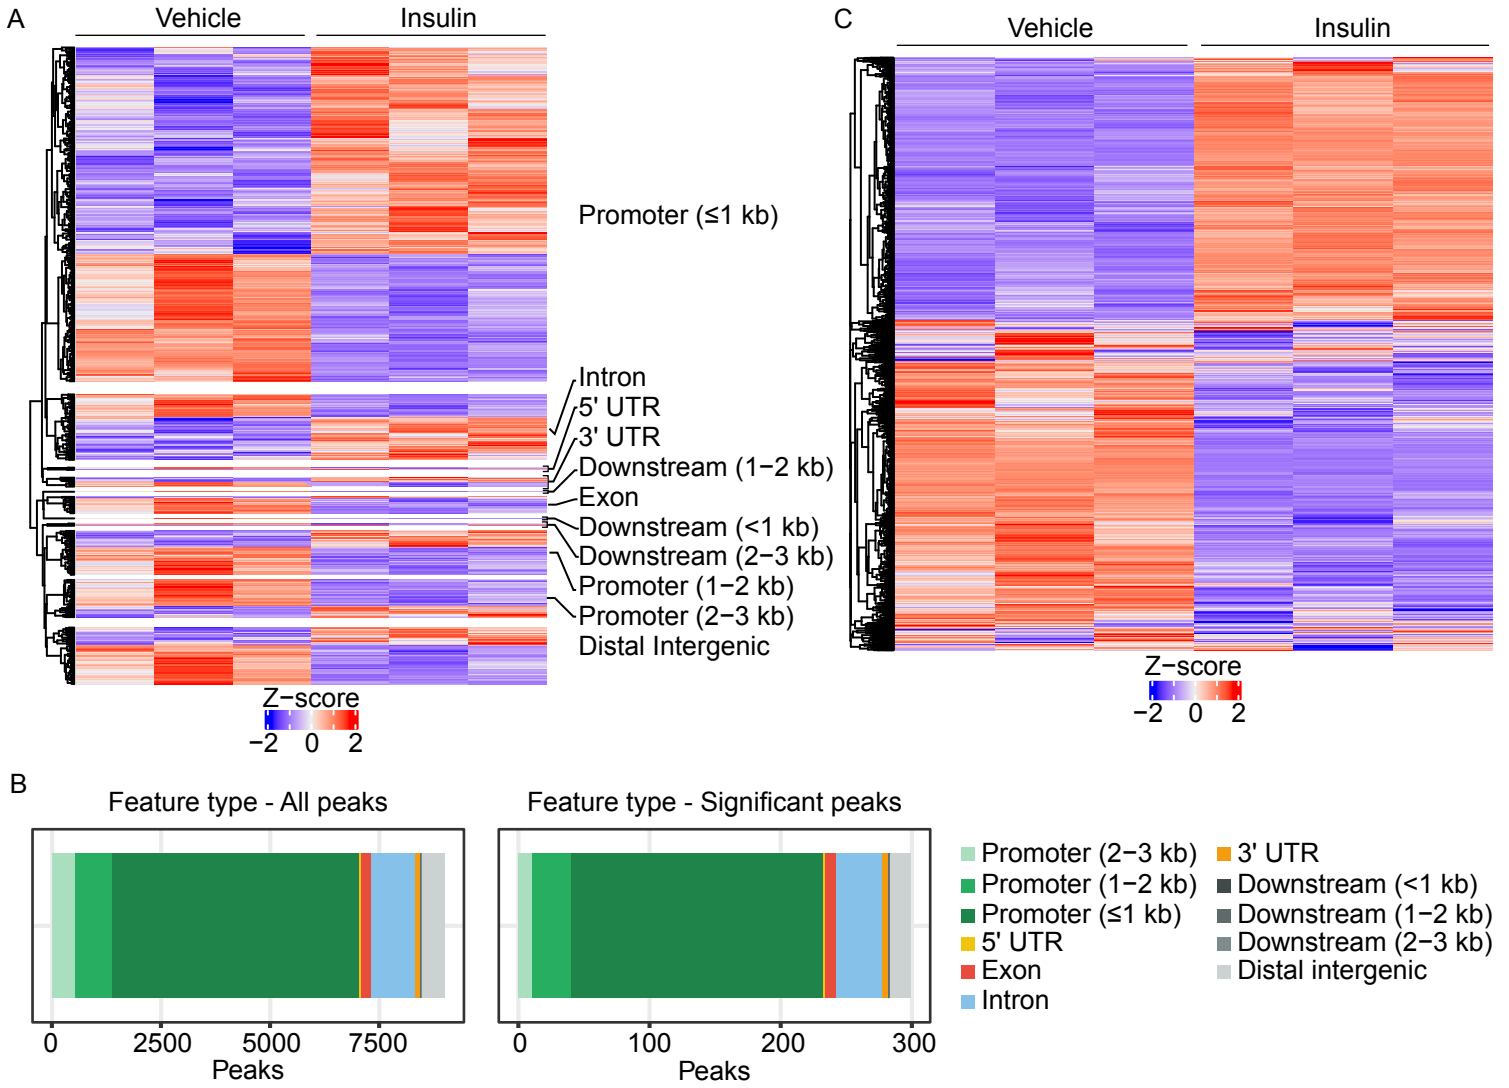

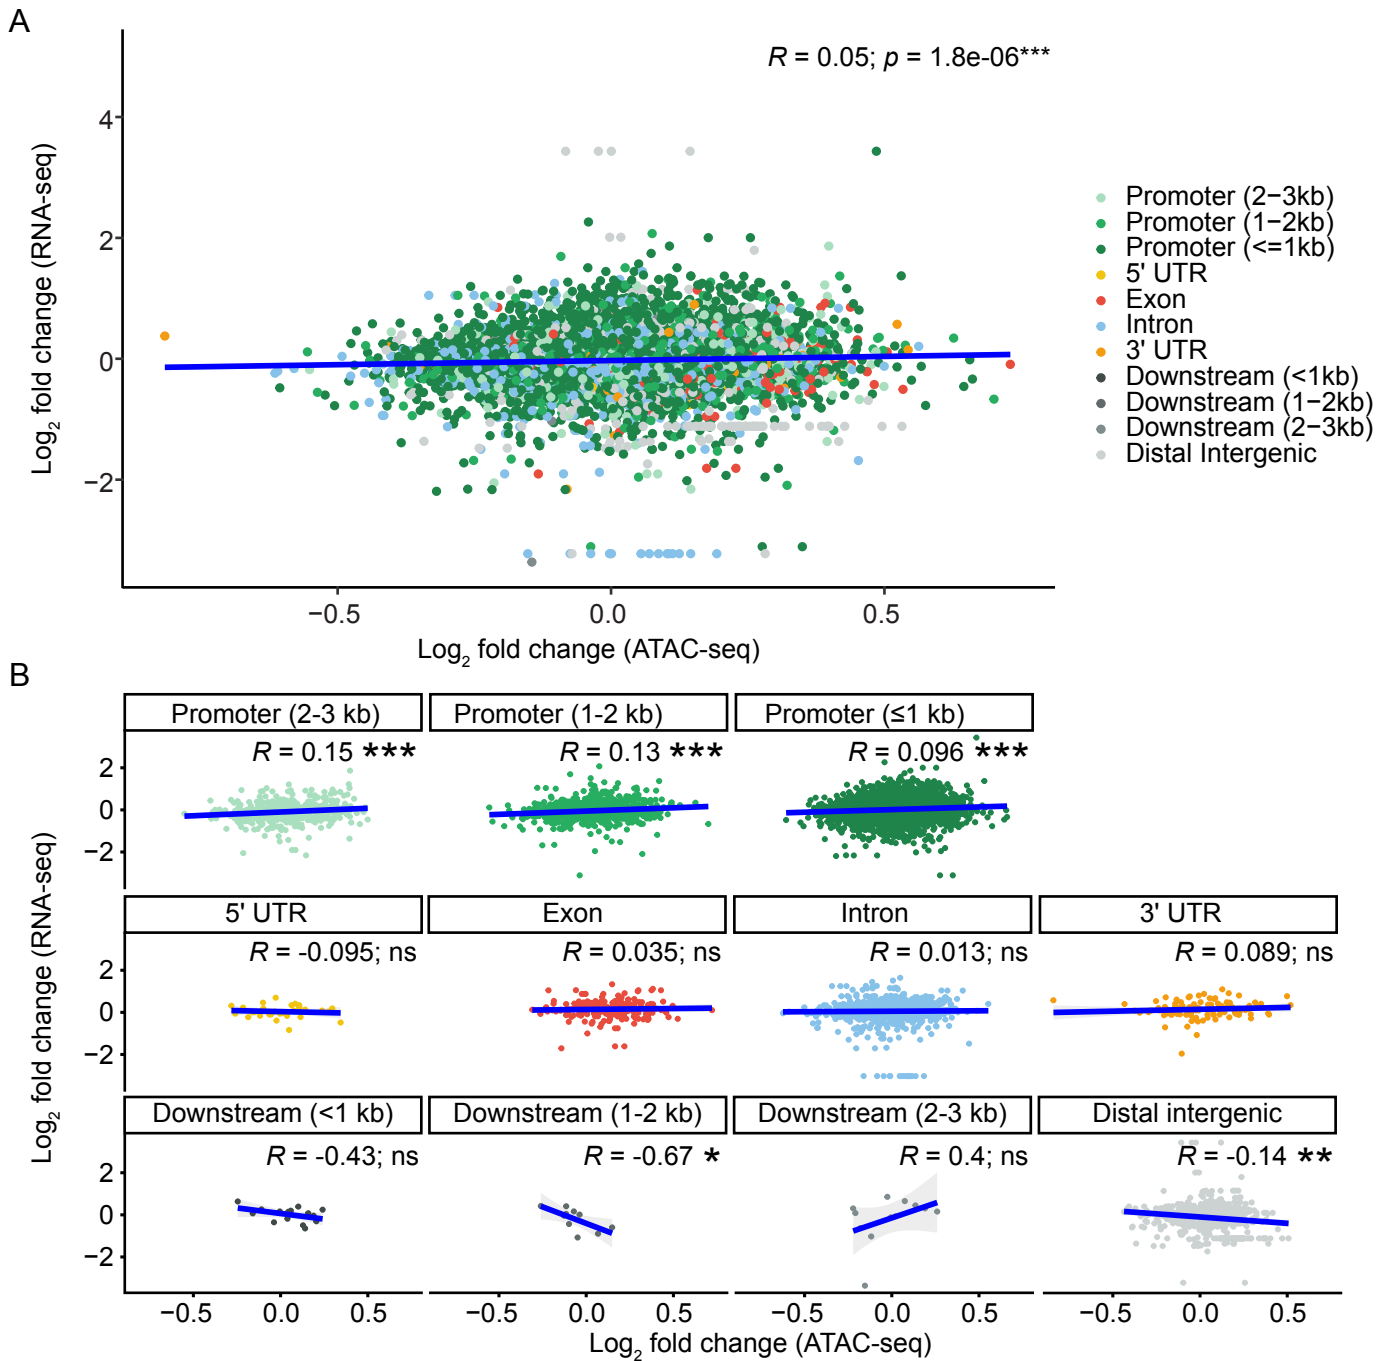

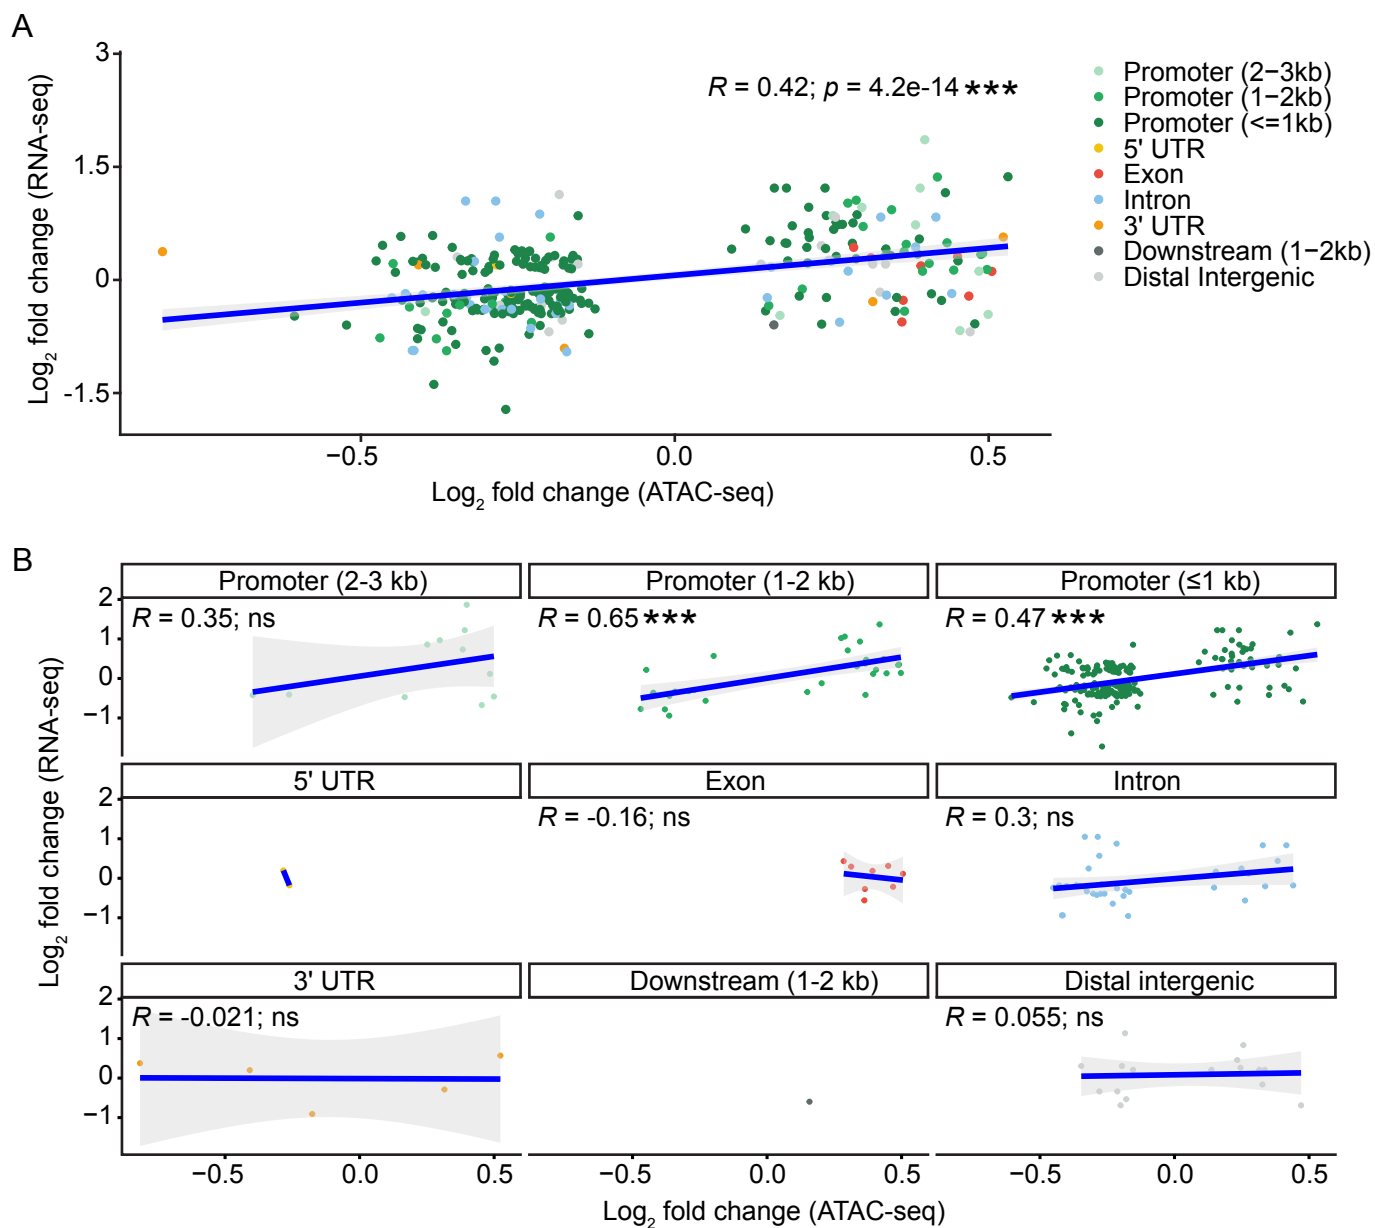

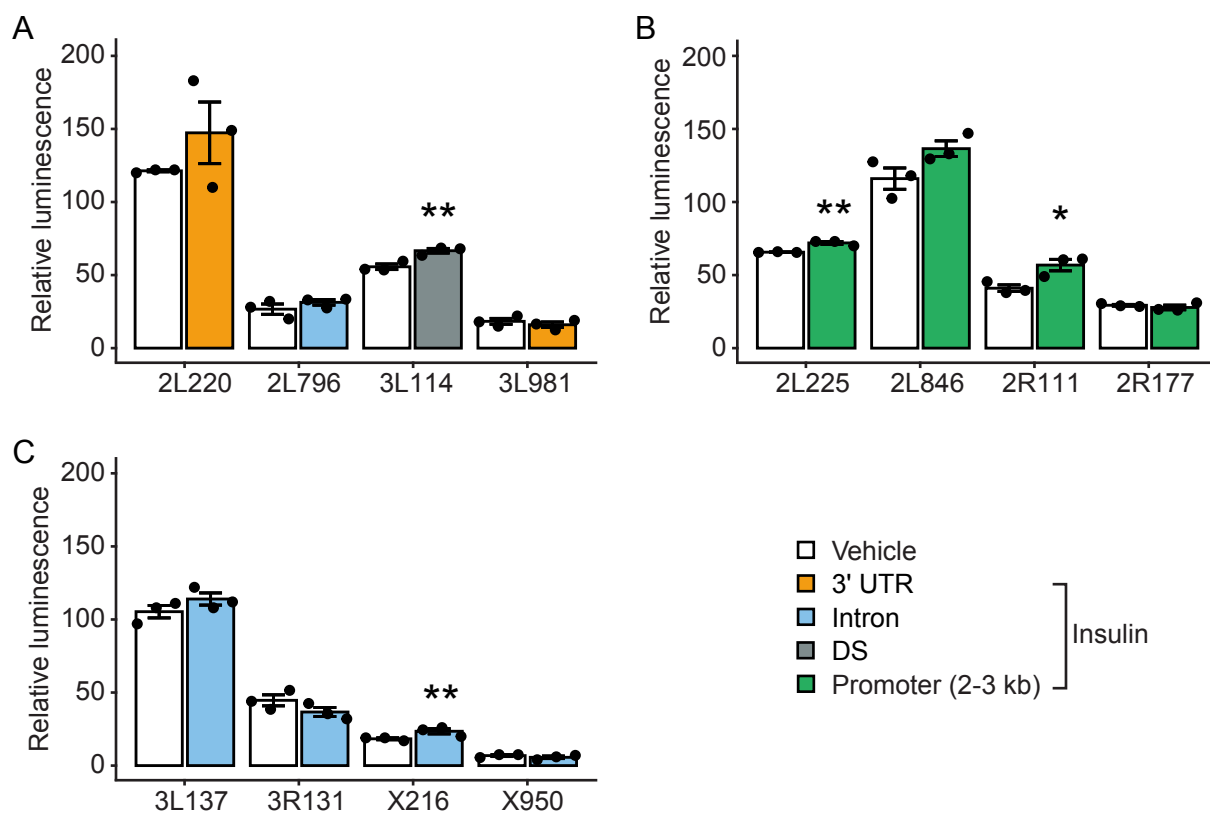

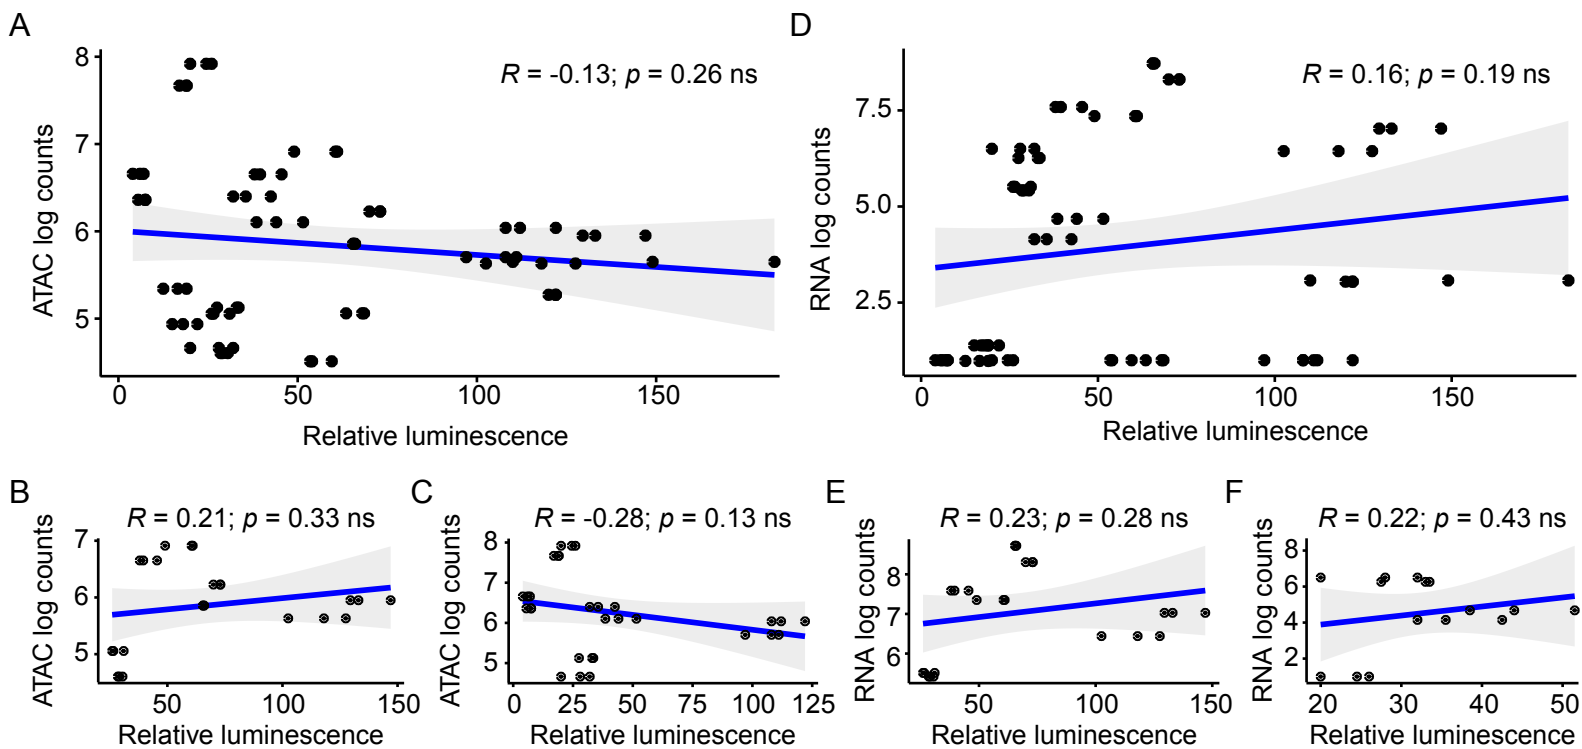

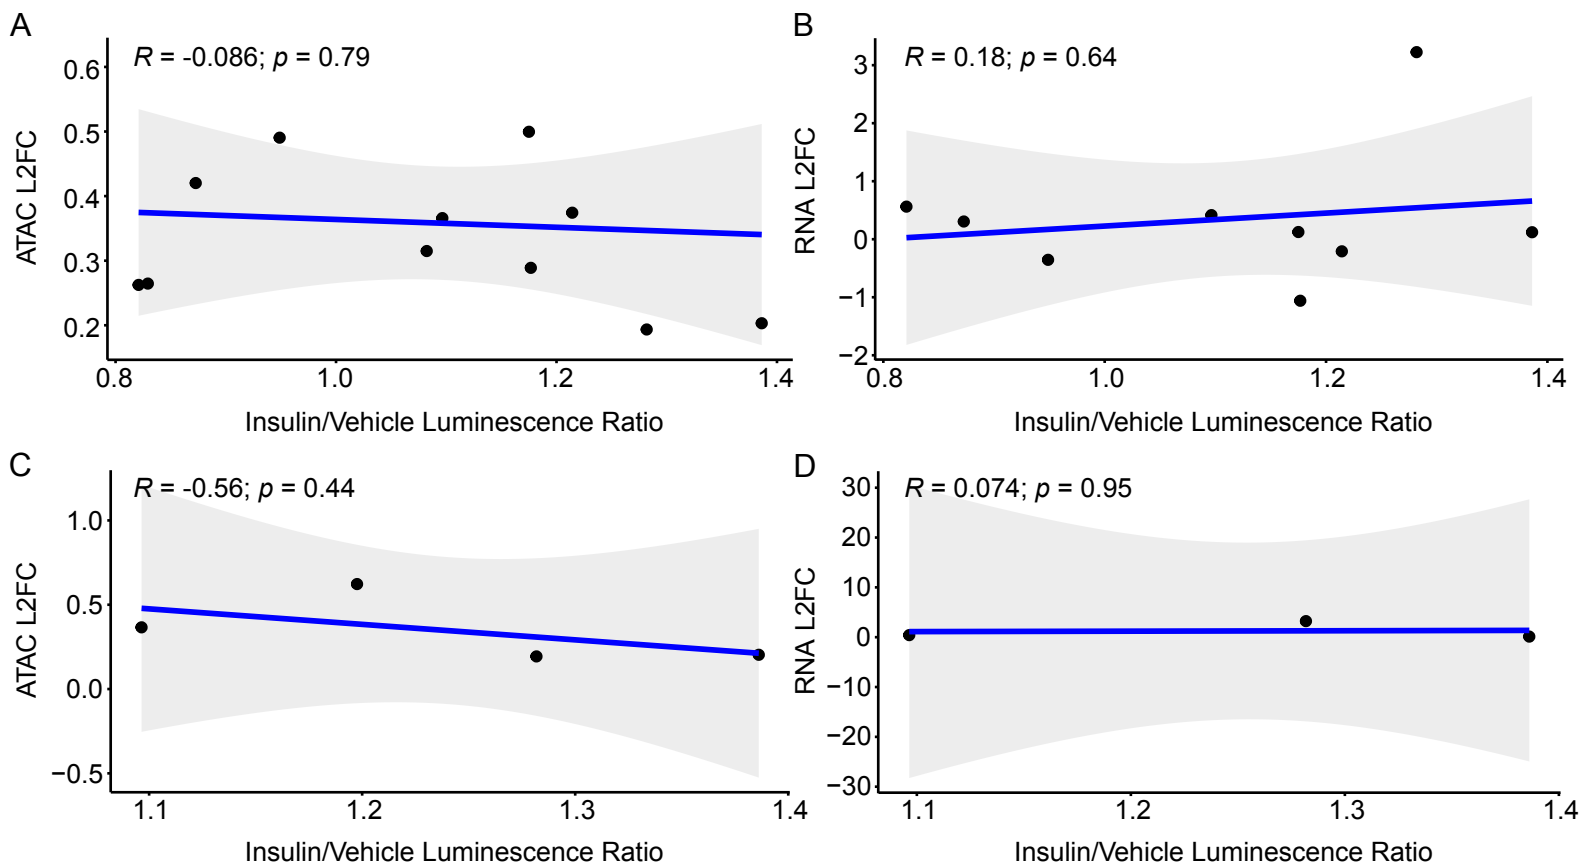

Source: https://www.biorxiv.org/content/10.1101/2021.05.06.443010v2.full.pdf
